# Supplementary material for: Effectiveness of Infection Control Teams in Reducing Healthcare-Associated Infections: A Systematic Review and Meta-Analysis
Source: MDPI journal article supplement (doi:10.3390/ijerph192417075), 2022-12-19

## Search strategy

### PubMed

|    |                                                                                                                                                                                                                                                                                                                                                                                                                                                                                                                                                                                                                                       |
|----|---------------------------------------------------------------------------------------------------------------------------------------------------------------------------------------------------------------------------------------------------------------------------------------------------------------------------------------------------------------------------------------------------------------------------------------------------------------------------------------------------------------------------------------------------------------------------------------------------------------------------------------|
| #1 | Search ("health personnel"[MeSH] OR health personnel[tw] OR (health* NEAR/3 personnel) OR "patient care team"[MeSH] OR patient care team*[tw] OR health care team*[tw] OR healthcare team*[tw] OR "physicians"[MeSH] OR "physician*" [tw] OR "doctor*" [tw] OR "nurses"[MeSH] OR "nurse*" [tw] OR link nurse*[tw] OR liaison nurse*[tw] OR "practitioner*" [tw] OR "specialist*" [tw] OR health consultant*[tw] OR healthcare professional*[tw] OR health care professional*[tw] OR "pharmacists"[MeSH] OR "pharmacist*" [tw] OR "microbiologist*" [tw] OR "champion*" [tw] OR "team*" [tw] OR manager*[tw] OR "preventionist*" [tw]) |
| #2 | Search ("infection control"[MeSH] OR infection control[tw] OR (infection* NEAR/3 control) OR (infection* AND control) OR infection prevention[tw] OR infection management[tw] OR ("infections"[MeSH] OR "infection*" [tw] AND ("control*" [tw] OR "prevention*" [tw] OR "management" [tw])))                                                                                                                                                                                                                                                                                                                                          |
| #3 | Search (infection control team*[tw] OR infection control specialist*[tw] OR "infection control practitioners"[MeSH] OR infection control practitioner*[tw] OR infection control doctor*[tw] OR infection control nurse*[tw] OR infection control link nurse*[tw] OR infection control champion*[tw] OR infection control preventionist*[tw])                                                                                                                                                                                                                                                                                          |
| #4 | Search ((randomized controlled trial [pt] OR controlled clinical trial [pt] OR randomized [tiab] OR placebo [tiab] OR clinical trials as topic [mesh: noexp] OR randomly [tiab] OR trial [ti]) NOT (animals [mh] NOT humans [mh]))                                                                                                                                                                                                                                                                                                                                                                                                    |
| #5 | Search (((#1 AND #2) OR #3) AND #4)                                                                                                                                                                                                                                                                                                                                                                                                                                                                                                                                                                                                   |
| #6 | Search (((#1 AND #2) OR #3) AND #4) Filters: English                                                                                                                                                                                                                                                                                                                                                                                                                                                                                                                                                                                  |

## EMBASE

|     |                                                                                                                                                                                                                                                                                                                                                                                               |
|-----|-----------------------------------------------------------------------------------------------------------------------------------------------------------------------------------------------------------------------------------------------------------------------------------------------------------------------------------------------------------------------------------------------|
| #1  | (health personnel OR (health* N3 personnel) OR patient care team* OR health care team* OR healthcare team* OR physician* OR doctor* OR nurse* OR link nurse* OR liaison nurse* OR practitioner* OR specialist* OR health consultant* OR healthcare professional* OR health care professional* OR pharmacist* OR microbiologist* OR champion* OR team* OR manager* OR preventionist*):ti,ab,kw |
| #2  | MeSH descriptor: [Health Personnel] explode all trees                                                                                                                                                                                                                                                                                                                                         |
| #3  | MeSH descriptor: [Physicians] explode all trees                                                                                                                                                                                                                                                                                                                                               |
| #4  | MeSH descriptor: [Nurses] explode all trees                                                                                                                                                                                                                                                                                                                                                   |
| #5  | MeSH descriptor: [Pharmacists] explode all trees                                                                                                                                                                                                                                                                                                                                              |
| #6  | MeSH descriptor: [Patient Care Team] explode all trees                                                                                                                                                                                                                                                                                                                                        |
| #7  | #1 OR #2 OR #3 OR #4 OR #5 OR #6                                                                                                                                                                                                                                                                                                                                                              |
| #8  | (infection control OR (infection* NEAR/3 control) OR (infection* AND control) OR infection prevention OR infection management):ti,ab,kw                                                                                                                                                                                                                                                       |
| #9  | MeSH descriptor: [Infection Control] explode all trees                                                                                                                                                                                                                                                                                                                                        |
| #10 | #8 OR #9                                                                                                                                                                                                                                                                                                                                                                                      |
| #11 | #7 AND #10                                                                                                                                                                                                                                                                                                                                                                                    |
| #12 | (infection control team* OR infection control specialist* OR infection control practitioner* OR infection control doctor* OR infection control nurse* OR infection control link nurse* OR infection control champion* OR infection control preventionist*):ti,ab,kw                                                                                                                           |
| #13 | MeSH descriptor: [Infection Control Practitioners] explode all trees                                                                                                                                                                                                                                                                                                                          |
| #14 | #12 OR #13                                                                                                                                                                                                                                                                                                                                                                                    |
| #15 | #11 OR #14                                                                                                                                                                                                                                                                                                                                                                                    |

## Cochrane

|     |                                                                                                                                                                                                                                                                                                                                                                                               |
|-----|-----------------------------------------------------------------------------------------------------------------------------------------------------------------------------------------------------------------------------------------------------------------------------------------------------------------------------------------------------------------------------------------------|
| #1  | (health personnel OR (health* N3 personnel) OR patient care team* OR health care team* OR healthcare team* OR physician* OR doctor* OR nurse* OR link nurse* OR liaison nurse* OR practitioner* OR specialist* OR health consultant* OR healthcare professional* OR health care professional* OR pharmacist* OR microbiologist* OR champion* OR team* OR manager* OR preventionist*):ti,ab,kw |
| #2  | MeSH descriptor: [Health Personnel] explode all trees                                                                                                                                                                                                                                                                                                                                         |
| #3  | MeSH descriptor: [Physicians] explode all trees                                                                                                                                                                                                                                                                                                                                               |
| #4  | MeSH descriptor: [Nurses] explode all trees                                                                                                                                                                                                                                                                                                                                                   |
| #5  | MeSH descriptor: [Pharmacists] explode all trees                                                                                                                                                                                                                                                                                                                                              |
| #6  | MeSH descriptor: [Patient Care Team] explode all trees                                                                                                                                                                                                                                                                                                                                        |
| #7  | #1 OR #2 OR #3 OR #4 OR #5 OR #6                                                                                                                                                                                                                                                                                                                                                              |
| #8  | (infection control OR (infection* NEAR/3 control) OR (infection* AND control) OR infection prevention OR infection management):ti,ab,kw                                                                                                                                                                                                                                                       |
| #9  | MeSH descriptor: [Infection Control] explode all trees                                                                                                                                                                                                                                                                                                                                        |
| #10 | #8 OR #9                                                                                                                                                                                                                                                                                                                                                                                      |
| #11 | #7 AND #10                                                                                                                                                                                                                                                                                                                                                                                    |
| #12 | (infection control team* OR infection control specialist* OR infection control practitioner* OR infection control doctor* OR infection control nurse* OR infection control link nurse* OR infection control champion* OR infection control preventionist*):ti,ab,kw                                                                                                                           |
| #13 | MeSH descriptor: [Infection Control Practitioners] explode all trees                                                                                                                                                                                                                                                                                                                          |
| #14 | #12 OR #13                                                                                                                                                                                                                                                                                                                                                                                    |
| #15 | #11 OR #14                                                                                                                                                                                                                                                                                                                                                                                    |

## CINAHL

|     |                                                                                                                                                                                                                                                                                                                                                                                                    |
|-----|----------------------------------------------------------------------------------------------------------------------------------------------------------------------------------------------------------------------------------------------------------------------------------------------------------------------------------------------------------------------------------------------------|
| S1  | (MH "HealthPersonnel+") OR (MH "Multidisciplinary CareTeam+") OR<br>(MH "Physicians+") OR (MH "Nurse Practitioners+") OR (MM "Pharmacist")                                                                                                                                                                                                                                                         |
| S2  | TI (health personnel OR (health* N3 personnel) OR patient care team* OR health<br>care team* OR healthcare team* OR physician* OR doctor* OR nurse* OR<br>linknurse* OR liaison nurse* OR practitioner* OR specialist* OR<br>healthconsultant* OR healthcare professional* OR health careprofessional* OR<br>pharmacist* OR microbiologist* OR champion* OR team* OR manager* OR<br>preventionist* |
| S3  | AB (health personnel OR (health* N3 personnel) OR patient care team* OR health<br>care team* OR healthcare team* OR physician* OR doctor* OR nurse* OR<br>linknurse* OR liaison nurse* OR practitioner* OR specialist* OR<br>healthconsultant* OR healthcare professional* OR health careprofessional* OR<br>pharmacist* OR microbiologist* OR champion* OR team* OR manager* OR<br>preventionist* |
| S4  | S1 OR S2 OR                                                                                                                                                                                                                                                                                                                                                                                        |
| S5  | (MH "Infection Control")                                                                                                                                                                                                                                                                                                                                                                           |
| S6  | TI (infection control OR (infection* N3 control) OR (infection* AND control) OR<br>infection prevention OR infection management                                                                                                                                                                                                                                                                    |
| S7  | AB (infection control OR (infection* N3 control) OR (infection* AND control)<br>OR infectionprevention OR infection management                                                                                                                                                                                                                                                                     |
| S8  | S5 OR S6 OR                                                                                                                                                                                                                                                                                                                                                                                        |
| S9  | S4 AND S8                                                                                                                                                                                                                                                                                                                                                                                          |
| S10 | (MM "Infection Preventionists")                                                                                                                                                                                                                                                                                                                                                                    |
| S11 | TI (infection control team* OR infectioncontrol specialist* OR infection control<br>practitioner* OR infectioncontrol doctor* OR infection control nurse* OR infection<br>control link nurse* OR infectioncontrol champion* OR infection control<br>preventionist                                                                                                                                  |
| S12 | AB (infection control team* OR infection control specialist* OR infection control                                                                                                                                                                                                                                                                                                                  |

|     |                                                                                                                                                                                                                                                                                                                                                                                                                                                                                                                                                                                                      |
|-----|------------------------------------------------------------------------------------------------------------------------------------------------------------------------------------------------------------------------------------------------------------------------------------------------------------------------------------------------------------------------------------------------------------------------------------------------------------------------------------------------------------------------------------------------------------------------------------------------------|
|     | practitioner* OR infection control doctor* OR infection control nurse*OR<br>infection control link nurse* OR infection control champion* OR infection control<br>preventionist                                                                                                                                                                                                                                                                                                                                                                                                                       |
| S13 | S10 OR S11 OR S12                                                                                                                                                                                                                                                                                                                                                                                                                                                                                                                                                                                    |
| S14 | S9 OR S13                                                                                                                                                                                                                                                                                                                                                                                                                                                                                                                                                                                            |
| S15 | ((MH "randomized controlled trials") OR (MH "double-blind studies") OR<br>(MH"single-blind studies") OR (MH "random assignment") OR (MH" pretest-post<br>test design") OR (MH "cluster sample") OR TI (randomised OR randomized) OR<br>AB (random*) OR TI (trial) OR (MH "sample size") AND AB (assigned OR<br>allocated OR control) OR (MH "placebos") OR PT (randomized controlled trial)<br>OR AB (control W5 group) OR (MH"crossover design") OR (MH "comparative<br>studies") OR AB (cluster W3 RCT)) NOT (((MH"Animals+") OR (MH" animal<br>studies")) OR TI (animal model*)) NOT (MH "human") |
| S16 | S14 AND S15                                                                                                                                                                                                                                                                                                                                                                                                                                                                                                                                                                                          |

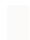

Supplement: s1 [file s1]
