# Supplementary material for: Effectiveness of Infection Control Teams in Reducing Healthcare-Associated Infections: A Systematic Review and Meta-Analysis
Source: MDPI journal article supplement (doi:10.3390/ijerph192417075), 2022-12-19
Supplement: s1 [file s1]

## Eligibility criteria

|                    | <b>Inclusion</b>                                                                                                                                                                                                                                                                                                                                                                                                                                                                      | <b>Exclusion</b>                                                                                                                                                         |
|--------------------|---------------------------------------------------------------------------------------------------------------------------------------------------------------------------------------------------------------------------------------------------------------------------------------------------------------------------------------------------------------------------------------------------------------------------------------------------------------------------------------|--------------------------------------------------------------------------------------------------------------------------------------------------------------------------|
| Population/setting | <p>Patients in inpatient hospitals or outpatient healthcare settings.</p> <p>Residents in long-term care setting.</p> <p>Any kind of healthcare professionals such as doctors, nurses, epidemiologists, microbiologists and nursing care home staff.</p>                                                                                                                                                                                                                              | <p>Non-healthcare professionals such as cleaning staff.</p> <p>Healthcare professionals in non-clinical setting such as class room or learning laboratory</p>            |
| Intervention       | <p>All infection prevention and control measures by ICT including ICLN system such as</p> <ul style="list-style-type: none"> <li>– Formulating and revising policies/guidelines</li> <li>– Performing surveillance of HCAs</li> <li>– Training and educating healthcare professionals</li> <li>– Monitoring and auditing practices and standard of care</li> <li>– Liaising with other staff and departments</li> </ul> <p>The intervention can be of any duration and frequency.</p> | <ul style="list-style-type: none"> <li>– Outbreak management</li> <li>– Infection control measures for human immunodeficiency virus, tuberculosis and malaria</li> </ul> |
| Comparison         | Any intervention or usual care                                                                                                                                                                                                                                                                                                                                                                                                                                                        |                                                                                                                                                                          |
| Outcome            | <p>Patient-based/clinical outcomes</p> <p>1. Rate of HCAs</p>                                                                                                                                                                                                                                                                                                                                                                                                                         | Rate of antimicrobial prescription                                                                                                                                       |

|              |                                                                                                                                                                                                             |                                                                                                                                                                                                                                                                                                                                                                                                                             |
|--------------|-------------------------------------------------------------------------------------------------------------------------------------------------------------------------------------------------------------|-----------------------------------------------------------------------------------------------------------------------------------------------------------------------------------------------------------------------------------------------------------------------------------------------------------------------------------------------------------------------------------------------------------------------------|
|              | 2. Death due to HCAs<br>3. Length of hospital stay<br>Staff-based/behavioural outcomes<br>1. Compliance with infection control practices<br>Additional outcomes<br>1. Cost of healthcare system or patients |                                                                                                                                                                                                                                                                                                                                                                                                                             |
| Study design | Randomised control trial (individual or cluster)                                                                                                                                                            | 1. Intervention studies (experimental) without control groups<br>2. Intermittent time series<br>3. Observational studies (nonexperimental)<br>4. Cohort (retrospective and prospective)<br>5. Case control<br>6. Case series<br>7. Cross-sectional<br>8. Ecologic<br>9. Reviews<br>10. Expert opinion or consensus<br>11. Editorial letter<br>12. Guideline<br>13. Implementation<br>14. Commentary<br>15. Outbreak reports |
| Period       | No limitation                                                                                                                                                                                               |                                                                                                                                                                                                                                                                                                                                                                                                                             |
| Language     | English language only                                                                                                                                                                                       |                                                                                                                                                                                                                                                                                                                                                                                                                             |
